# Supplementary material for: Chronic pain in primary care. German figures from 1991 and 2006
Source: BMC Public Health. 2009 Aug 18;9:299. doi: 10.1186/1471-2458-9-299 (PMC2744700; doi:10.1186/1471-2458-9-299)
Supplement: Additional file 1 — German Questionnaire. The file provides the German questionnaire used in this study. [file 1471-2458-9-299-S1.pdf]

## Fragebogen

### Teil A:

1. *Geschlecht:* ☐ weiblich ☐ männlich
2. *Alter:* \_\_\_\_\_ Jahre
3. *Sind Sie:* ☐ ledig ☐ verheiratet ☐ verwitwet ☐ geschieden?
4. *Haben Sie Kinder?* ☐ nein ☐ ja Wie viele? \_\_\_\_\_
5. *Wohnen Sie alleine?* ☐ nein ☐ ja
6. *Welche Schulausbildung haben Sie?* ☐ Hauptschule ☐ Realschule  
☐ Abitur ☐ Sonstiges
7. *Welche Tätigkeit/ Beruf üben Sie aus?* \_\_\_\_\_  
☐ berufstätig ☐ derzeit ohne Beschäftigung  
☐ Rentner ☐ Hausfrau/ -mann
- 8.a *Sind Schmerzen der Grund des heutigen Arztbesuches?* ☐ ja ☐ nein
- 8.b *Unter welchen Schmerzen leiden Sie?* ☐ keinen  
☐ akuten (seit Stunden oder Tagen auftretender Schmerz)  
☐ chronischen (wiederkehrender oder anhaltender Schmerz länger als 6 Monate)

Wenn Sie an chronischen Schmerzen leiden, füllen Sie bitte auch Teil B aus.

Herzlichen Dank!

**Teil B:**

9. *Wie lange leiden Sie bereits an chronischen Schmerzen?*

- ☐ 6 bis 12 Monate      ☐ 1-2 Jahre      ☐ 2-5 Jahre  
☐ 5-10 Jahre      ☐ 10-20 Jahre      ☐ mehr als 20 Jahre

10. *Wo haben Sie Schmerzen?* (Mehrfachauswahl möglich.)

- ☐ Rücken      ☐ Brust      ☐ Gelenke  
☐ Beine      ☐ Arme      ☐ Kopf  
☐ Hand      ☐ Fuß      ☐ Ganzer Körper  
☐ Oberbauch      ☐ Unterbauch

*Nähere Beschreibung:* \_\_\_\_\_

11. *Wie oft haben Sie Schmerzen?*

- ☐ dauernd      ☐ mehrmals täglich  
☐ alle paar Tage      ☐ alle paar Wochen

12. *Wie stark sind Ihre Schmerzen?*

Bleiben Ihre Schmerzen konstant, so markieren Sie nur eine Zahl in der Tabelle von 0 bis 10. Bei Schmerzen schwankender Intensität zeichnen Sie bitte ein Minimum und ein Maximum ein.

(0= keine Schmerzen, 10= stärkste Schmerzen)

| 0 | 1 | 2 | 3 | 4 | 5 | 6 | 7 | 8 | 9 | 10 |
|---|---|---|---|---|---|---|---|---|---|----|
|   |   |   |   |   |   |   |   |   |   |    |

13. *Wie lange dauern die Schmerzen an?* (Mehrfachauswahl möglich.)

- ☐ minutenlang      ☐ stundenlang  
☐ tagelang      ☐ ständig vorhanden

14. *Haben sich die Schmerzen im Laufe der Zeit verändert?* (Mehrfachauswahl möglich.)

- ☐ nein      ☐ stärker geworden      ☐ seltener geworden  
☐ schwächer geworden      ☐ häufiger geworden

15. *Was sehen Sie als Ursache für ihre Schmerzen?* (Mehrfachauswahl möglich.)

- ☐ Verschleiß      ☐ seelische Belastung      ☐ Unfall  
☐ Beruf      ☐ Operation: \_\_\_\_\_ ☐ Kriegsverletzung  
☐ Vererbung      ☐ Krankheit: \_\_\_\_\_  
☐ Sonstiges: \_\_\_\_\_

16. *Wann treten die Schmerzen auf?* (Mehrfachauswahl möglich.)

- ☐ mit Auslöser, Einwirkung      ☐ ohne Auslöser, spontan

17. Was kann Ihre Schmerzen auslösen oder verstärken? (Mehrfachauswahl möglich.)

- ☐ körperliche Belastung      ☐ psychische Belastung, Stress      ☐ Wetter  
☐ Stimulation (Alkohol, Zigaretten, Kaffee)      ☐ Entspannung  
☐ Tageszeiten:    ☐ Morgens    ☐ Mittags    ☐ Abends    ☐ Nachts  
☐ Sonstiges: \_\_\_\_\_

18. Was kann Ihre Schmerzen lindern? (Mehrfachauswahl möglich.)

- ☐ Medikamente      ☐ Wärme      ☐ Ruhigstellung  
☐ alleine sein, Ruhe      ☐ Kälte      ☐ Bewegung, Sport  
☐ Freunde, Familie      ☐ besondere Körperhaltung      ☐ Urlaub, Erholung  
☐ gar nichts      ☐ Sonstiges: \_\_\_\_\_

19. Wie wirken sich die Schmerzen auf Ihren Alltag aus? (Mehrfachauswahl möglich.)

- ☐ keine Beeinträchtigung      ☐ vermehrt Aggression, Ungeduld, Nervosität  
☐ Beeinträchtigung im Haushalt      ☐ Beeinträchtigung bei Körperpflege  
☐ öfter Spannungen mit Mitmenschen      ☐ eingeschränkte Freizeitgestaltung  
☐ Sonstiges: \_\_\_\_\_

20.a Schlafen Sie aufgrund der Schmerzen schlechter? ☐ ja      ☐ nein

20.b Wenn ja, nehmen Sie Medikamente zum Schlafen? ☐ ja      ☐ nein

20.c Wenn ja, welche? \_\_\_\_\_

21. Wenn Sie berufstätig sind: beeinträchtigen die Schmerzen Ihren Beruf?  
(Mehrfachauswahl möglich.)

- ☐ tageweise Fehlen bei der Arbeit      ☐ Rentenantrag gestellt  
☐ Berentung aufgrund der Schmerzen      ☐ Berufswechsel  
☐ Teilzeitarbeit      ☐ Konzentrationsschwäche  
☐ keine berufliche Beeinträchtigung

22. Wie wirken sich die Schmerzen auf Ihre Lebensqualität aus?

(0= keine Beeinflussung, 10= starke Beeinflussung)

| 0 | 1 | 2 | 3 | 4 | 5 | 6 | 7 | 8 | 9 | 10 |
|---|---|---|---|---|---|---|---|---|---|----|
|   |   |   |   |   |   |   |   |   |   |    |

23. Welche Fachärzte haben Sie wegen Ihrer Schmerzen aufgesucht?

(z.B. Allgemeinmedizin, Chirurgie, Neurologie, Orthopädie, Psychologie, Heilpraktiker, Schmerzlinik etc.)

\_\_\_\_\_

24. Kennen Sie die Diagnose Ihrer Schmerzen?

- ☐ nein      ☐ ja, meine Diagnose lautet: \_\_\_\_\_

25. *Welche Therapien haben Sie aufgrund der Schmerzen gemacht? (Mehrfachauswahl möglich.)*

- |                                                  |                                                                       |                                     |
|--------------------------------------------------|-----------------------------------------------------------------------|-------------------------------------|
| <input type="checkbox"/> keine                   |                                                                       |                                     |
| <input type="checkbox"/> psychologische Therapie | <input type="checkbox"/> Kur                                          | <input type="checkbox"/> Operation  |
| <input type="checkbox"/> Medikamente             | <input type="checkbox"/> Spritzen                                     | <input type="checkbox"/> Akupunktur |
| <input type="checkbox"/> Krankengymnastik        | <input type="checkbox"/> physikalische Therapie (z.B. Thermotherapie) |                                     |
| <input type="checkbox"/> Massage                 | <input type="checkbox"/> Sonstiges: _____                             |                                     |

26. *Welche Behandlung hat Ihre Schmerzen am wirkungsvollsten gelindert? (Mehrfachauswahl möglich.)*

- |                                                  |                                                                       |                                     |
|--------------------------------------------------|-----------------------------------------------------------------------|-------------------------------------|
| <input type="checkbox"/> keine                   |                                                                       |                                     |
| <input type="checkbox"/> psychologische Therapie | <input type="checkbox"/> Kur                                          | <input type="checkbox"/> Operation  |
| <input type="checkbox"/> Medikamente             | <input type="checkbox"/> Spritzen                                     | <input type="checkbox"/> Akupunktur |
| <input type="checkbox"/> Krankengymnastik        | <input type="checkbox"/> physikalische Therapie (z.B. Thermotherapie) |                                     |
| <input type="checkbox"/> Massage                 | <input type="checkbox"/> Sonstiges: _____                             |                                     |

27.a *Welche Medikamente nehmen Sie derzeit gegen Ihre Schmerzen ein?*

---

---

27.b *Nach welchem Schema nehmen Sie diese Medikamente ein? (Mehrfachauswahl möglich.)*

- ☐ nach Bedarf: welche? \_\_\_\_\_
- ☐ nach festem Zeitplan: welche? \_\_\_\_\_

28. *Haben Sie zuvor andere Medikamente gegen Schmerzen verschrieben bekommen? Wenn ja, welche?*

---

---

29. *Welche Nebenwirkungen haben Sie bei der Einnahme von Schmerzmedikamenten bisher bemerkt? (Mehrfachauswahl möglich.)*

- |                                           |                                       |                                          |
|-------------------------------------------|---------------------------------------|------------------------------------------|
| <input type="checkbox"/> keine            | <input type="checkbox"/> Verstopfung  | <input type="checkbox"/> Schläfrigkeit   |
| <input type="checkbox"/> Magenbeschwerden | <input type="checkbox"/> Allergie     | <input type="checkbox"/> Kopfschmerzen   |
| <input type="checkbox"/> Abgeschlagenheit | <input type="checkbox"/> Abhängigkeit | <input type="checkbox"/> Sonstige: _____ |

30. *Haben Sie bereits im Jahre 1990/ 1991 an einer ähnlichen Befragung teilgenommen?*

- ☐ ja                      ☐ nein

**Herzlichen Dank für ihre Mitarbeit!**
